# Supplementary material for: Psychotherapie bei juveniler Adipositas: gerechtfertigt und sinnvoll?
Source: Springer Nature journal article supplement (doi:10.1007/s00278-020-00474-2), 2020-12-09
Supplement: MOESM1 [file 18670092]

| **Studie** | **Stichprobe/Design** | **Erfassung psychischer Auffälligkeiten** | **Erfassung Gewichts-status** | **ausgewählte Ergebnisse** |
| --- | --- | --- | --- | --- |
| Harcourt et al. (2019)  Psychosocial measures and weight change in a clinical paediatric population with obesity | **Stichprobe:** 250 Kinder/Jugendliche mit Adipositas  **Alter:** 2–18 Jahre  **Setting:** einjähriges ambulantes Gewichtsreduktionsprogramm  **Erhebungszeitpunkte:** innerhalb der Intervention alle 3-4 Monate (darüber hinaus kein Follow-Up)  **Land:** Australien | u.a. SDQ (Selbst- und Elternbericht) | objektiver BMI z-Score | höhere Verhaltensprobleme und Hyperaktivität prädizieren geringeren Gewichtsverlust nach 12 Monaten |
| Blomquist et al. (2018)  Behavioral and psychological predictors of BMI reduction in children seeking  treatment at a hospital clinics family based pediatric weight management  program | **Stichprobe:** 662 Kinder/Jugendliche mit Übergewicht/Adipositas  **Alter:** 4-19 Jahre  **Setting:** ambulantes familienzentriertes Gewichtsreduktionsprogramm (8 wöchentliche Sitzungen)  **Erhebungszeitpunkte:** Vor und nach Gewichtsreduktionsprogramm (kein weiterer Follow-Up)  **Land:** USA | CBCL (Elternbericht) | objektiver BMI-z-Score | externalisierende Probleme prädizieren geringeren z-BMI  (weitere Skalen der CBCL nicht signifikant) |
| Eiffener et al. (2019)  The influence of preschoolers' emotional and behavioural problems on obesity treatment outcomes: Secondary findings from a randomized controlled trial | Stichprobe: 77 Kinder mit Adipositas  Alter: **4‐6** Jahre  **Setting:** ambulante Standartbehandlung durch Ärzte & Schwestern, in der Experimentalgruppe ergänzt durch 10 wöchentliche Eltern-Sitzungen  **Erhebungszeitpunkte:** vor Interventionsbeginn sowie nach 12 Monaten  **Land:** Schweden | CBCL (Elternbericht) | objektiver BMI z-score | Verbesserung emotionaler Probleme und Verhaltensprobleme durch ambulante Behandlung  Aufmerksamkeitsprobleme/ Hyperaktivität: geringere Gewichtsreduktion  Oppositionelles Verhalten, externalisierende Verhaltensweisen und Verhaltensprobleme: höhere Gewichtsreduktion  Veränderung der CBCL-Werte kein signifikanter Prädiktor für die Gewichtsveränderung |
| Goldschmidt et al. (2014)  Predictors of child weight loss and maintenance among family-based treatment completers | **Stichprobe:** 150 Kinder und Jugendliche mit Übergewicht  **Alter:** 7–12 Jahre  **Setting:** 5-monatiges ambulantes familienbasiertes Gewichtsreduktionsprogramm mit anschließender Nachversorgung über 4 Monate (3 verschiedene Nachversorgungsprogramme)  **Erhebungszeitpunkte:** Vor Behandlungsbeginn, nach Ende des ambulanten Programms, nach Ende der Nachversorgung, 12 und 24 Monate nach Ende des ambulanten Programms  **Land:** USA | CBCL (Elternbericht) | objektiver BMI z-score | CBCL nicht direkt (sondern nur in Interaktion mit der Art des Nachversorgungsprogramms) prädiktiv für Gewichtsveränderung |
| Braet (2006)  Patient characteristics as predictors of weight  loss after an obesity treatment for children | **Stichprobe**: 122 Kinder/Jugendliche mit Adipositas  **Alter:** 7-17 Jahre  **Setting:** 10-monatiges stationäres multimodales Gewichtsreduktionsprogramm  **Erhebungszeitpunkte:** Behandlungsbeginn, Behandlungsende, 2 Jahre nach Behandlungsende  **Land:** Belgien | CBCL (Elternbericht) YSR (Selbstbericht) | objektiver BMI-z-Score | CBCL nicht prädiktiv für langfristige Gewichtsveränderung nach 2 Jahren  Reduktion psychischer Probleme im Verlauf des Gewichtsreduktionsprogramms |
